# Supplementary material for: Synthesis of some new acylhydrazone compounds containing the 1,2,4-triazole structure and their neuritogenic activities in Neuro-2a cells
Source: Royal Society of Chemistry journal article supplement (doi:10.1039/d0ra02880k), 2020-01-01
Supplement: d0ra02880k1.pdf [file d0ra02880k1.pdf]

## Supplementary Materials: Synthesis of Some Acylhydrazone Compounds Containing 1, 2, 4-Triazole Structure and Their Neuritogenic Activity

### Content

<sup>1</sup>H-NMR, <sup>13</sup>C-NMR and GC-MS spectra of compound A0–A10. Western blot analysis of the effect of compound A5 on the Neuro-2a cells.

#### *4-amino-5-(pyridin-4-yl)-4H-pyrazole-3-thiol (A0)*

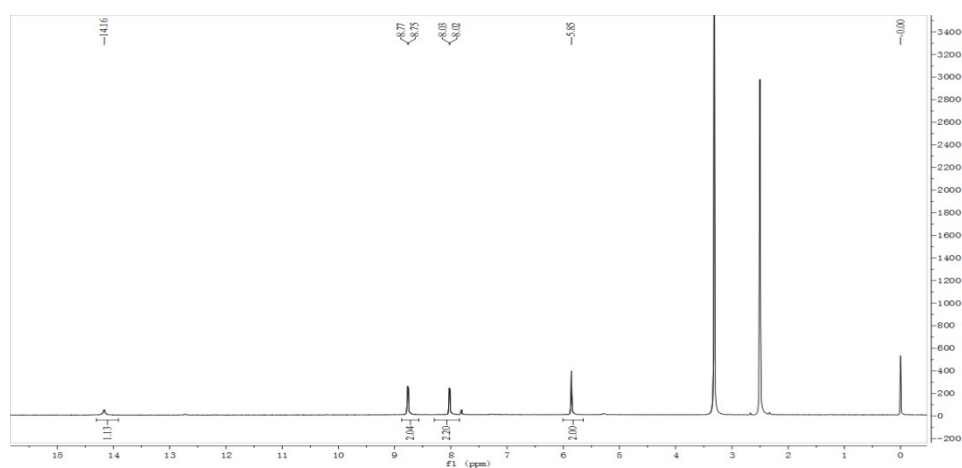

Figure S1. <sup>1</sup>H-NMR of compound A0.

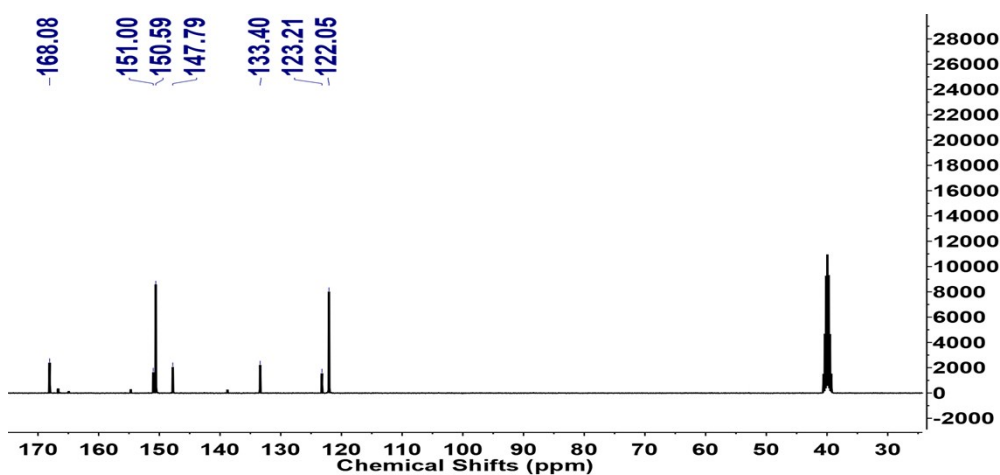

Figure S2. <sup>13</sup>C-NMR of compound A0.

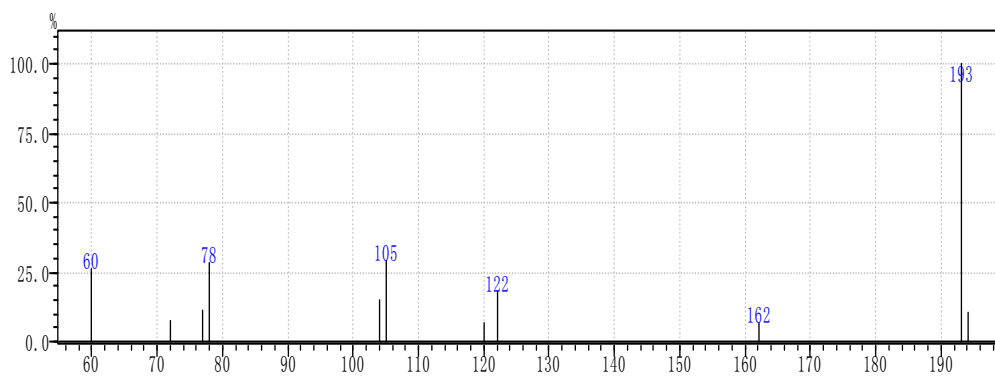

**Figure S3.** GC-MS of compound A0.

*Ethyl 2-(4-amino-5-(pyridin-4-yl)-4H-pyrazol-3-ylthio) acetate 9 (A1)*

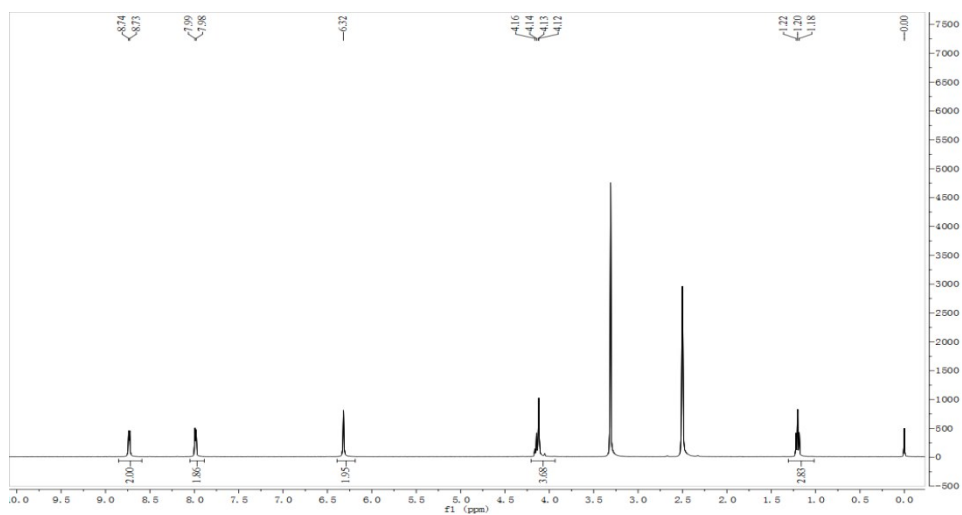

**Figure S4.**  $^1\text{H-NMR}$  of compound A1.

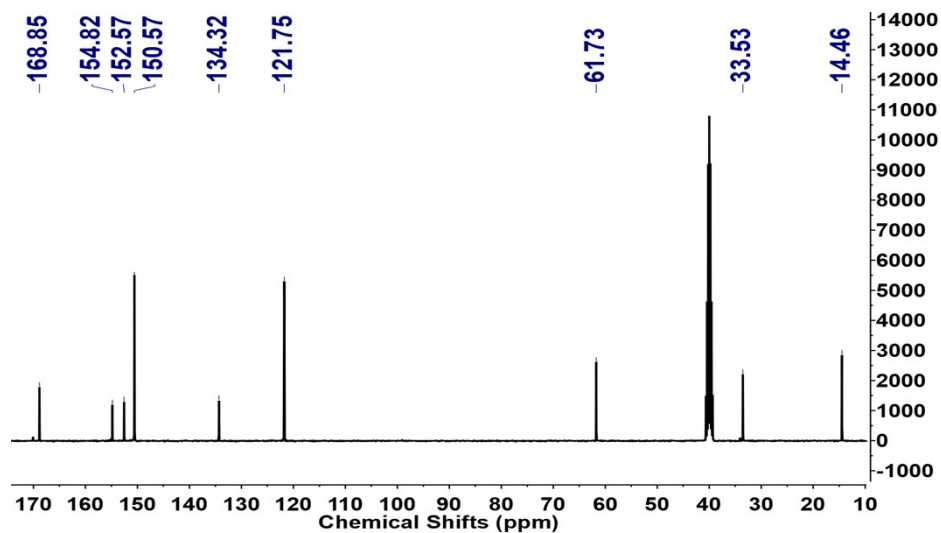

Figure S5.  $^{13}\text{C}$ -NMR of compound A1.

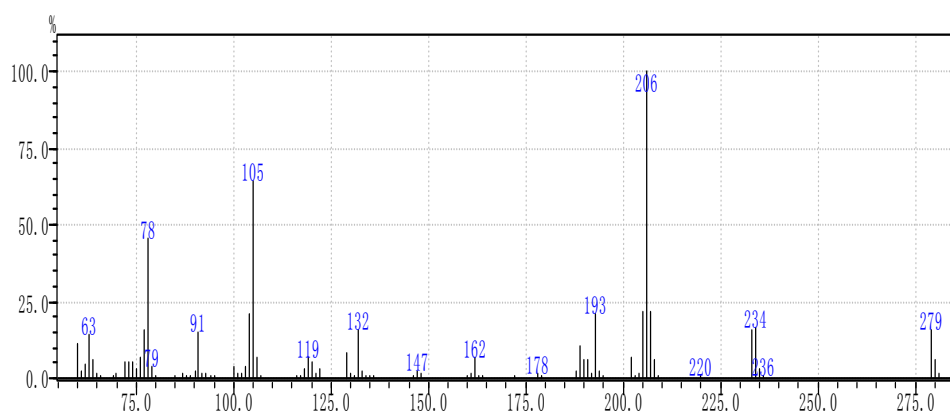

Figure S6. GC-MS of compound A1.

*2-(4-amino-5-(pyridin-4-yl)-4H-pyrazol-3-ylthio)acetohydrazide (A2)*

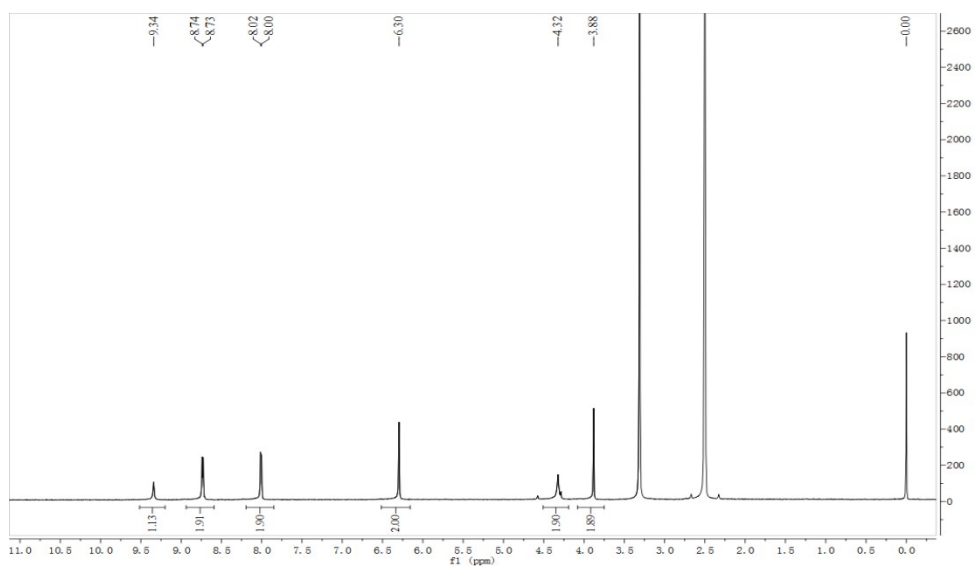

Figure S7.  $^1\text{H-NMR}$  of compound A2.

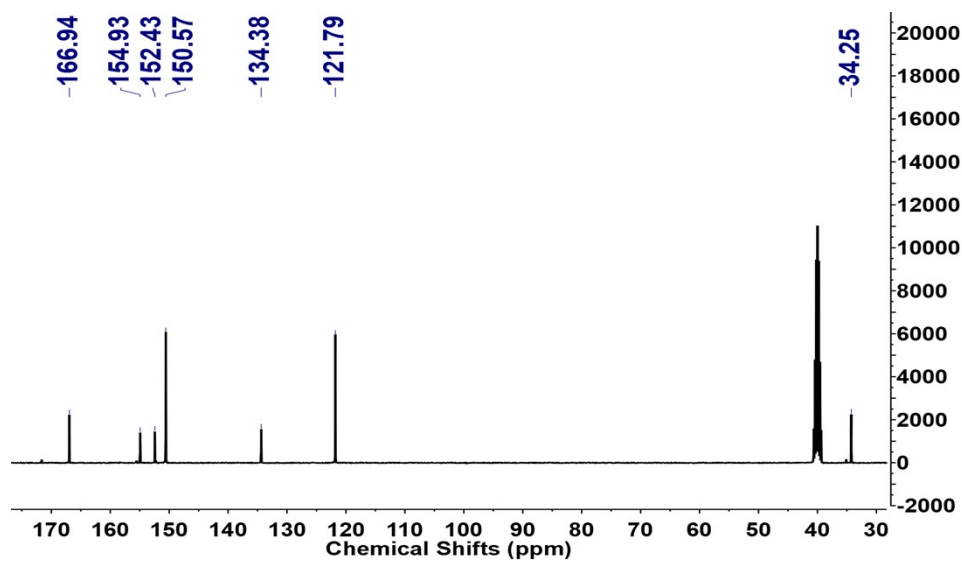

Figure S8.  $^{13}\text{C-NMR}$  of compound A2

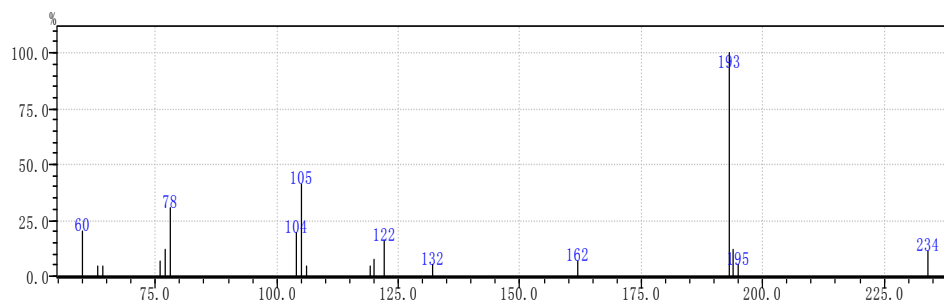

Figure S9. GC-MS of compound A2.

*2-(4-amino-5-(pyridin-4-yl)-4H-1,2,4-triazol-3-ylthio)-N'-(3-phenylallylidene)acetohydrazide*  
(A3):

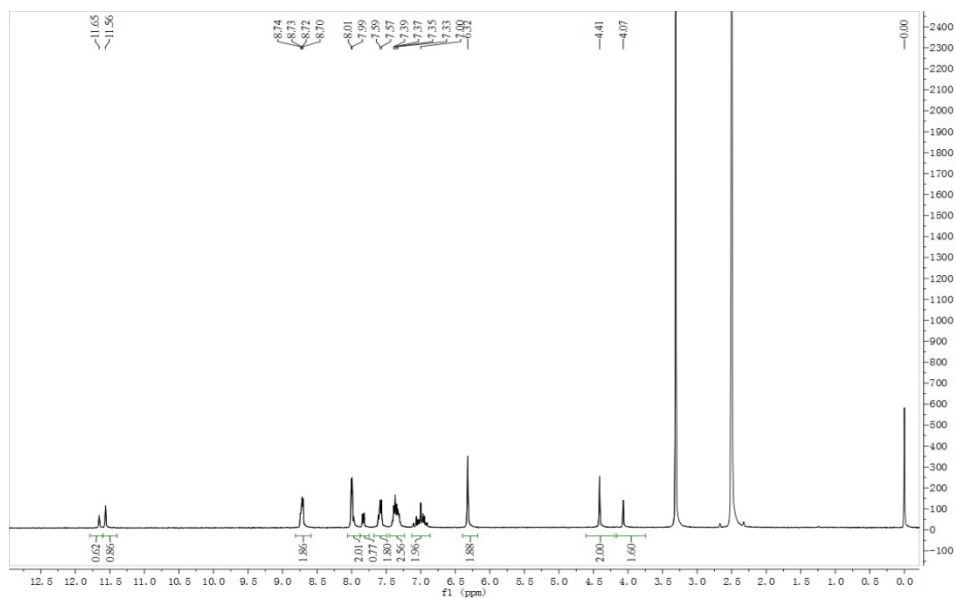

Figure S10. <sup>1</sup>H-NMR of compound A3.

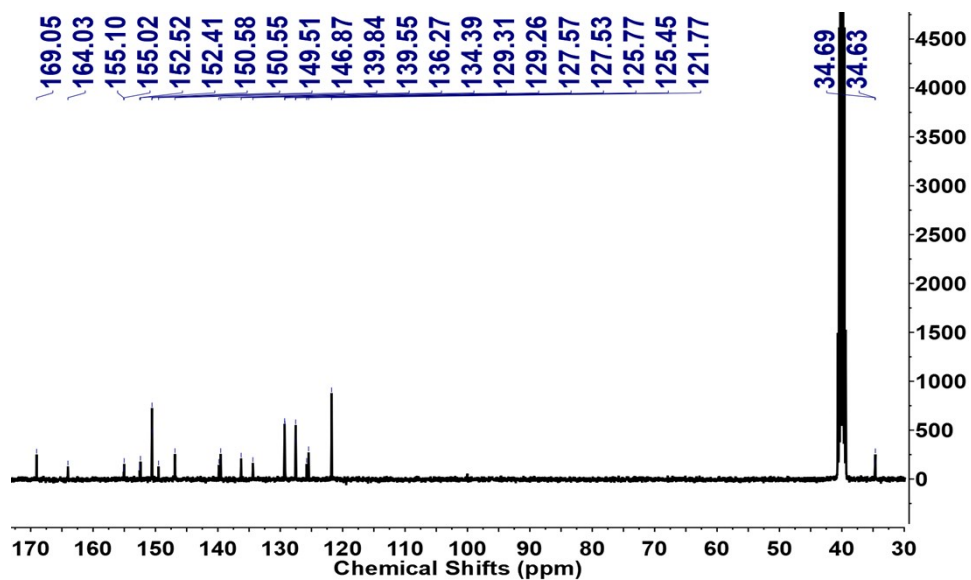

Figure S11. <sup>13</sup>C-NMR of compound A3.

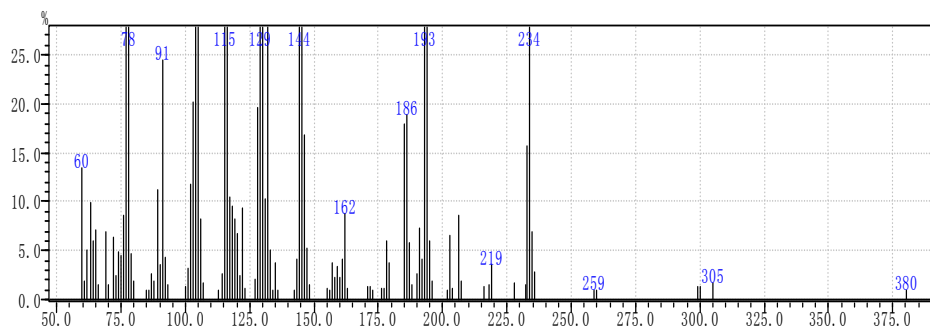

**Figure S12.** GC-MS of compound A3.

***2-(4-amino-5-(pyridin-4-yl)-4H-1,2,4-triazol-3-ylthio)-N'-(thiophen-2-ylmethylene)acetohydrazide (A4)***

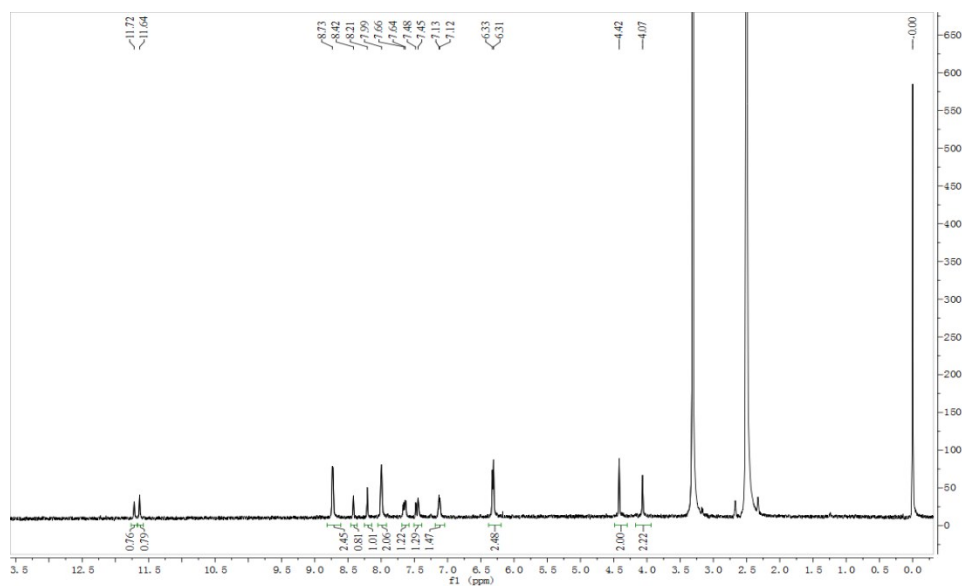

**Figure S13.** <sup>1</sup>H-NMR of compound A4.

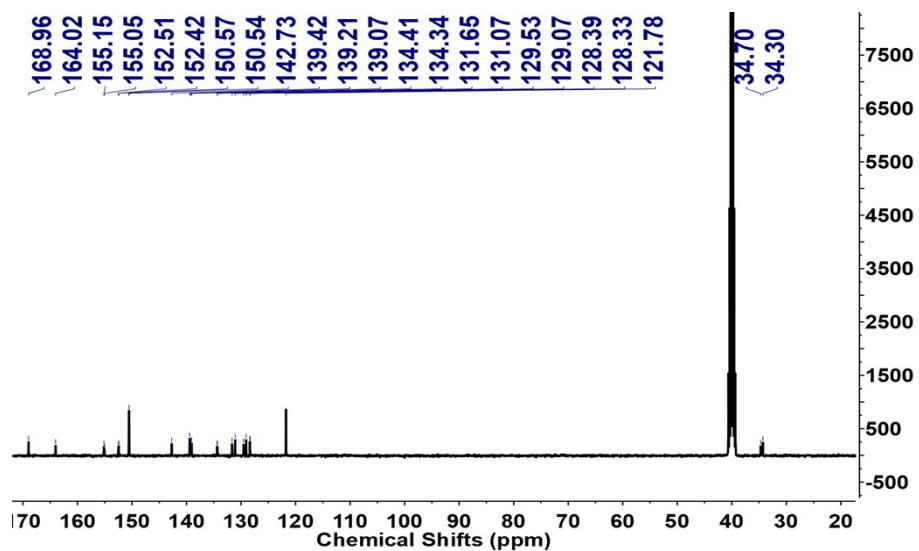

Figure S14.  $^{13}\text{C}$ -NMR of compound A4.

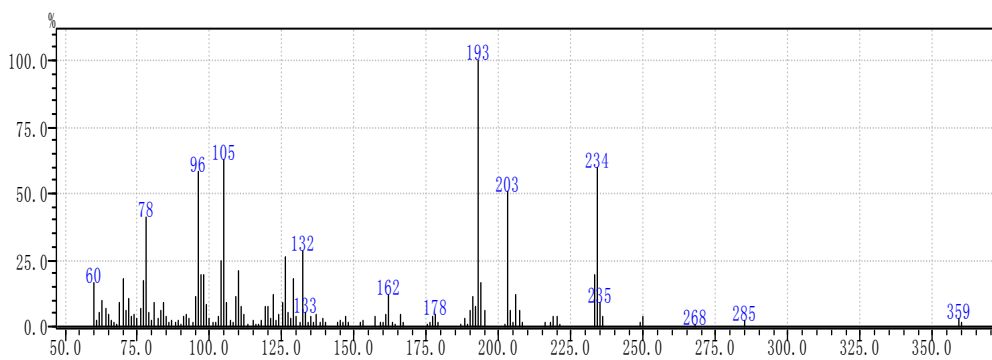

Figure S15. GC-MS of compound A4.

*2-(4-amino-5-(pyridin-4-yl)-4H-1,2,4-triazol-3-ylthio)-N'-(2-hydroxybenzylidene)-acetohydrazide (A5)*





Figure S18. GC-MS of compound A5.

*2-(4-amino-5-(pyridin-4-yl)-4H-1,2,4-triazol-3-ylthio)-N'-(naphthalen-1-ylmethylene)acetohydrazide (A6)*

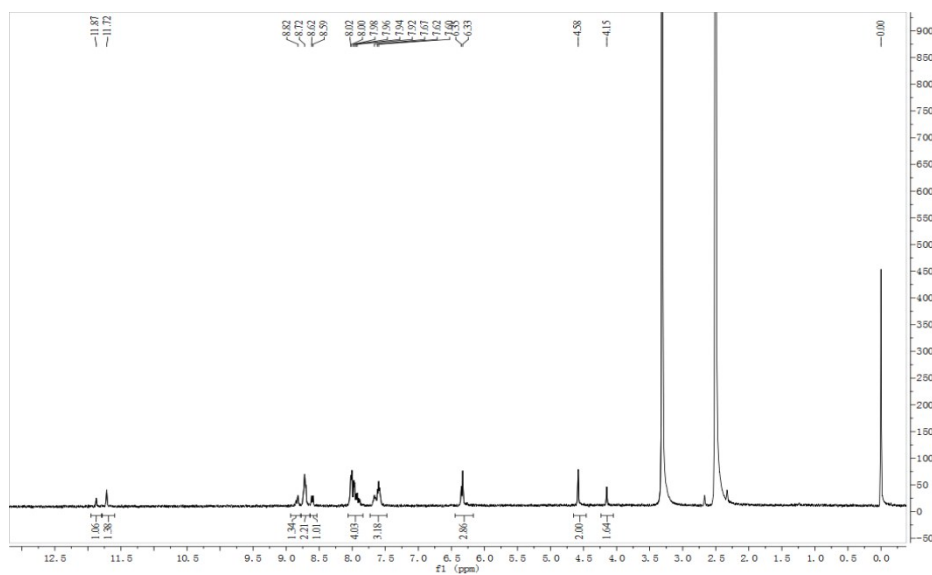

Figure S19. <sup>1</sup>H-NMR of compound A6.

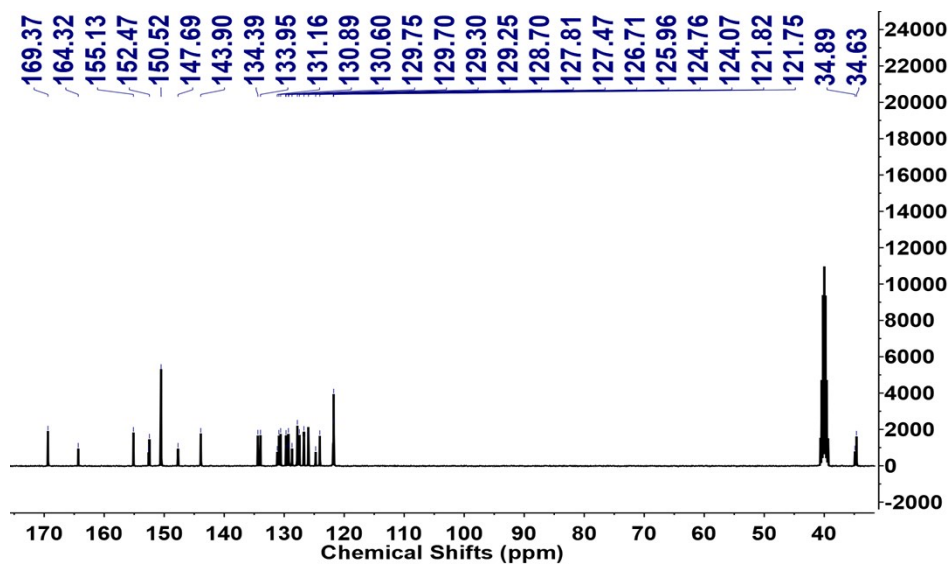

Figure S20. <sup>13</sup>C-NMR of compound A6.

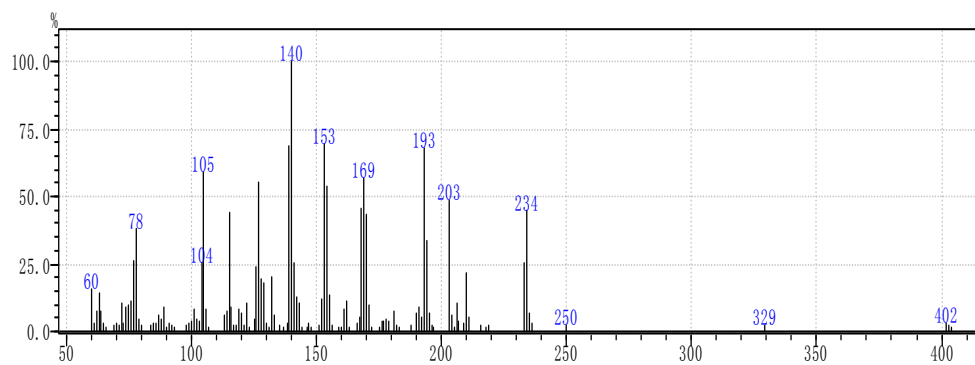

**Figure S21.** GC-MS of compound A6.

***2-(4-amino-5-(pyridin-4-yl)-4H-pyrazol-3-ylthio)-N'-(5-bromo-2-hydroxybenzylidene)acetohydrazide (A7)***

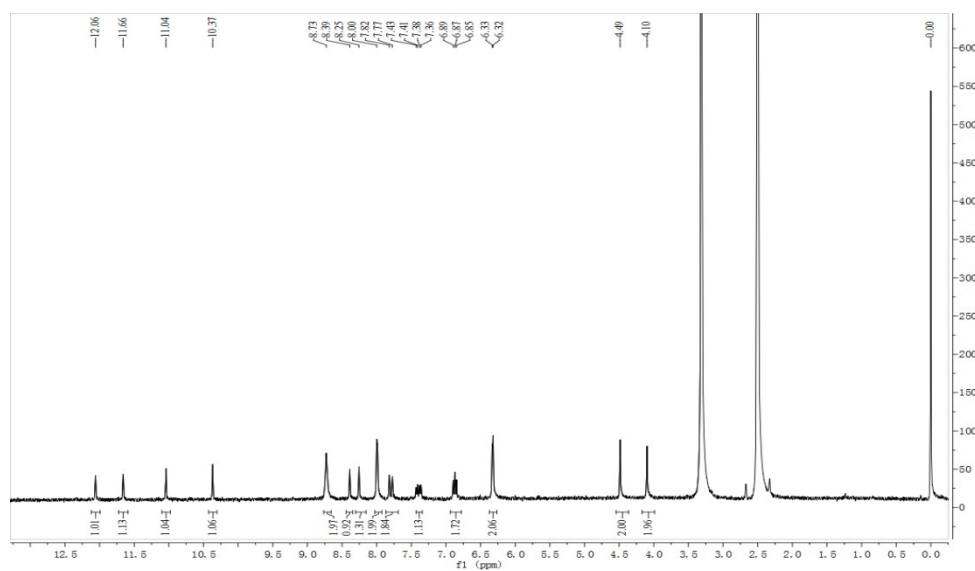

**Figure S22.**  $^1\text{H-NMR}$  of compound A7.

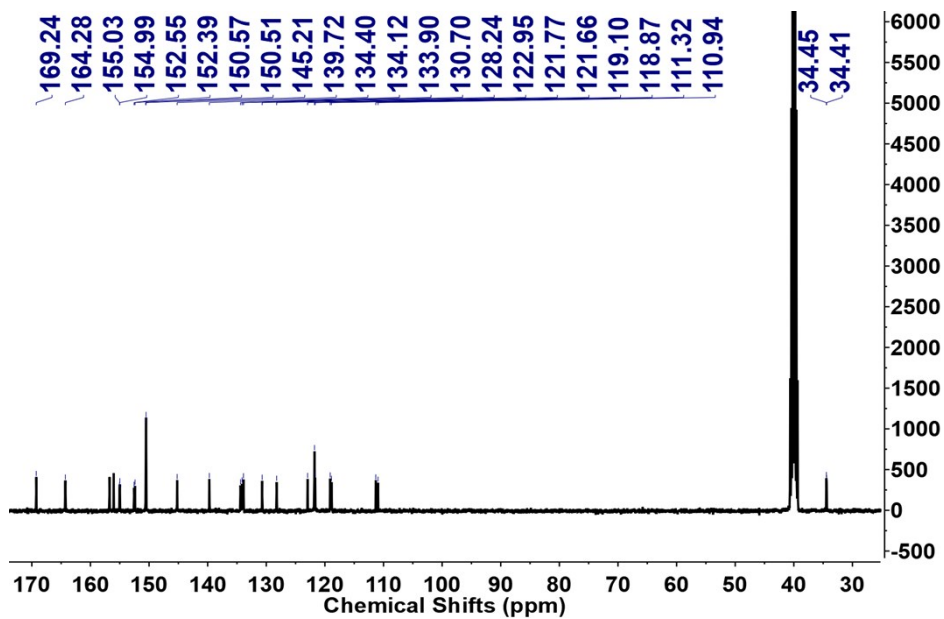

Figure S23.  $^{13}\text{C}$ -NMR of compound A7.

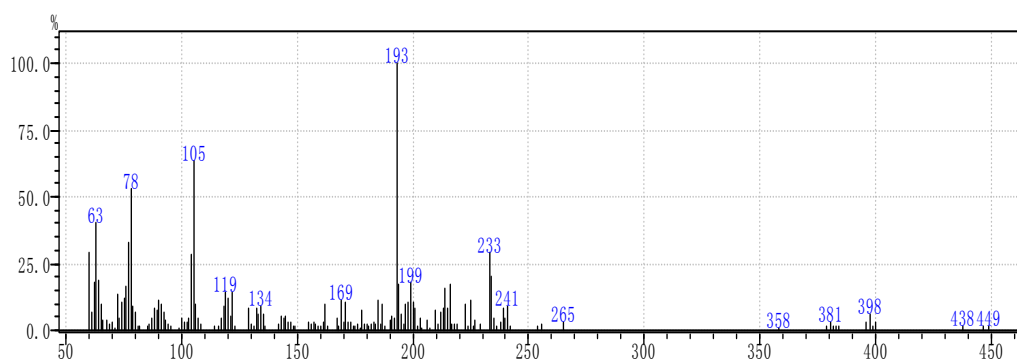

Figure S24. GC-MS of compound A7.

*2-(4-amino-5-(pyridin-4-yl)-4H-pyrazol-3-ylthio)-N'-(pyridin-2-ylmethylene)acetohydrazide (A8)*

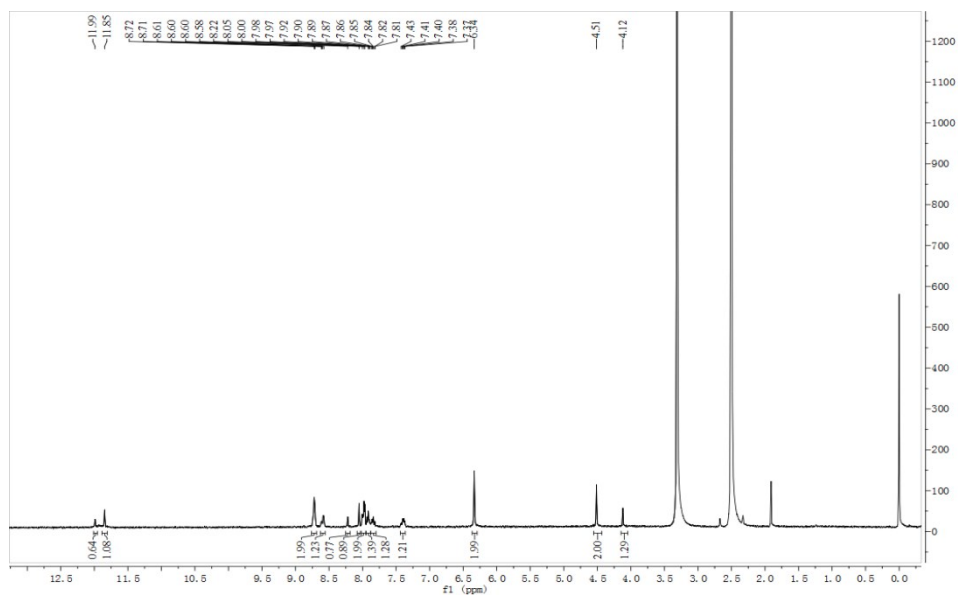

Figure S25. <sup>1</sup>H-NMR of compound A8.

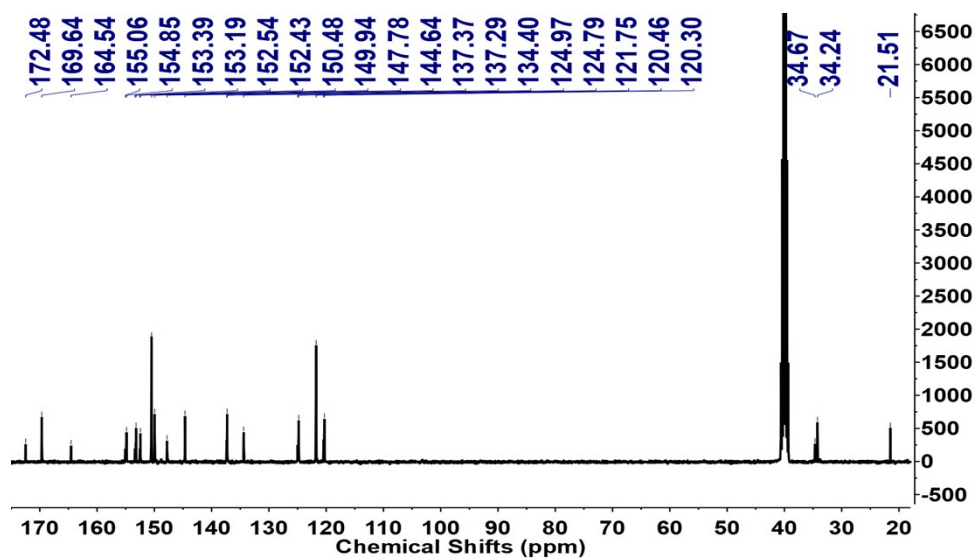

Figure S26. <sup>13</sup>C-NMR of compound A8.

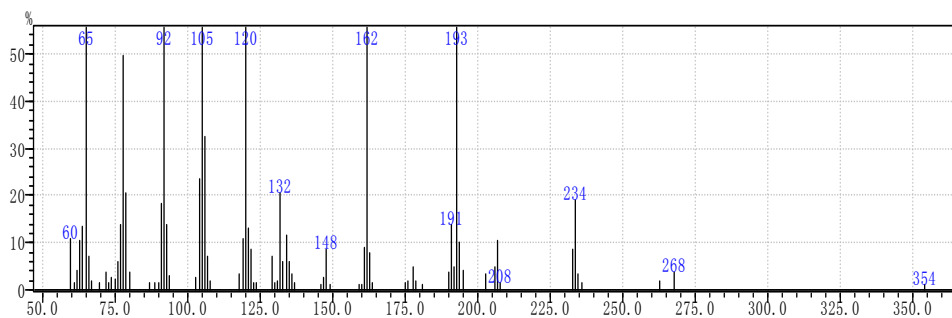

**Figure S27.** GC-MS of compound A8.

***2-(4-amino-5-(pyridin-4-yl)-4H-pyrazol-3-ylthio)-N'-(4-hydroxybenzylidene)acetohydrazide (A9)***

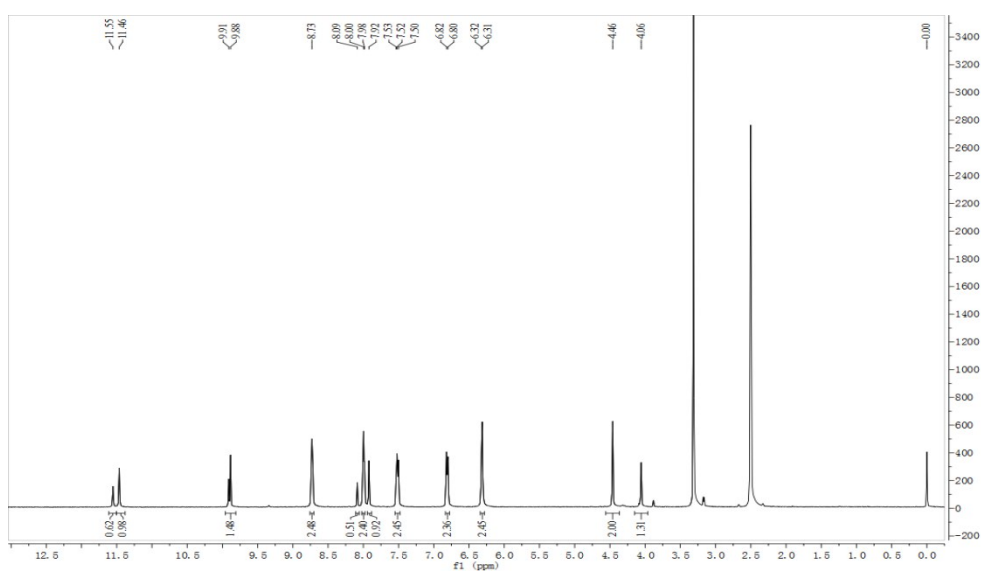

**Figure S28.**  $^1\text{H-NMR}$  of compound A9.

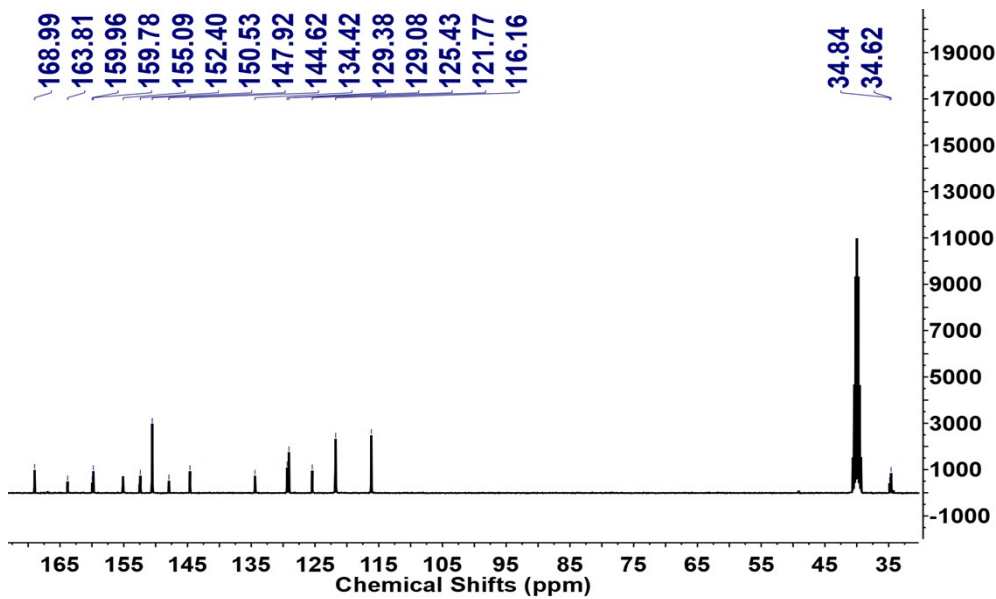

Figure S29.  $^{13}\text{C}$ -NMR of compound A9.

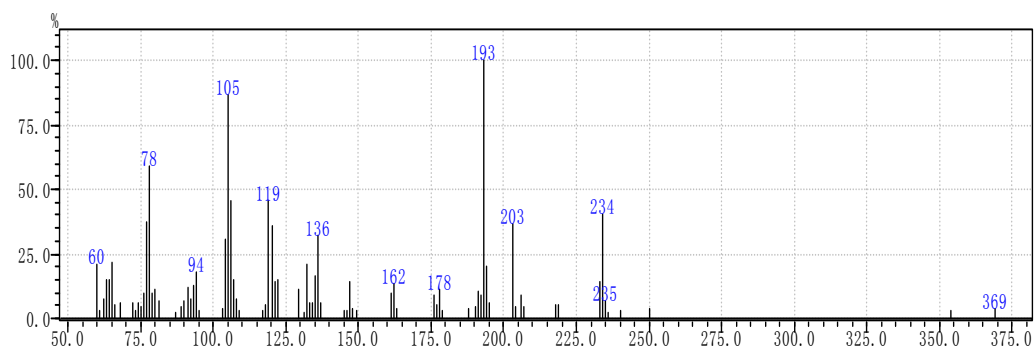

Figure S30. GC-MS of compound A9.

**2-(4-amino-5-(pyridin-4-yl)-4H-pyrazol-3-ylthio)-N'-benzylideneacetohydrazide (A10)**

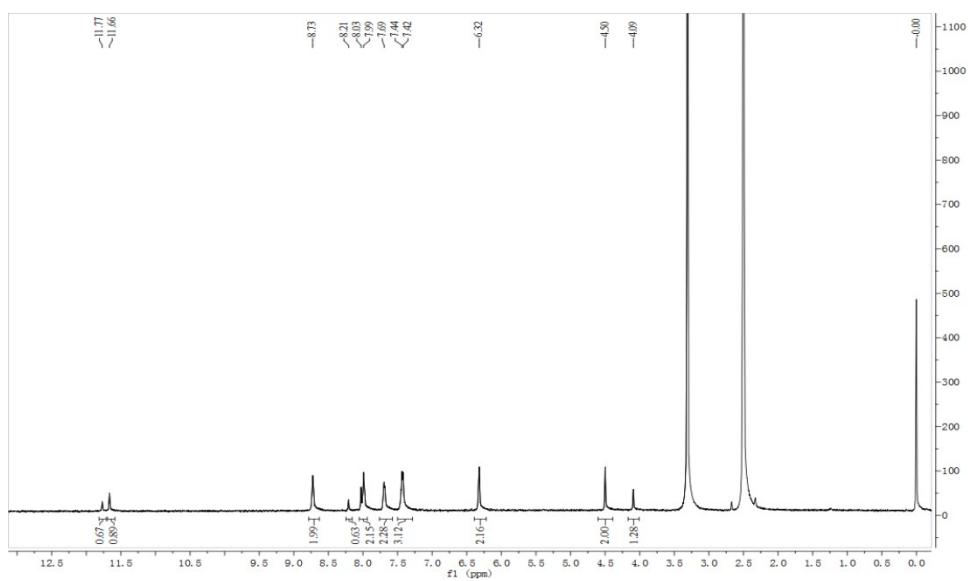

Figure S31. <sup>1</sup>H-NMR of compound A10.

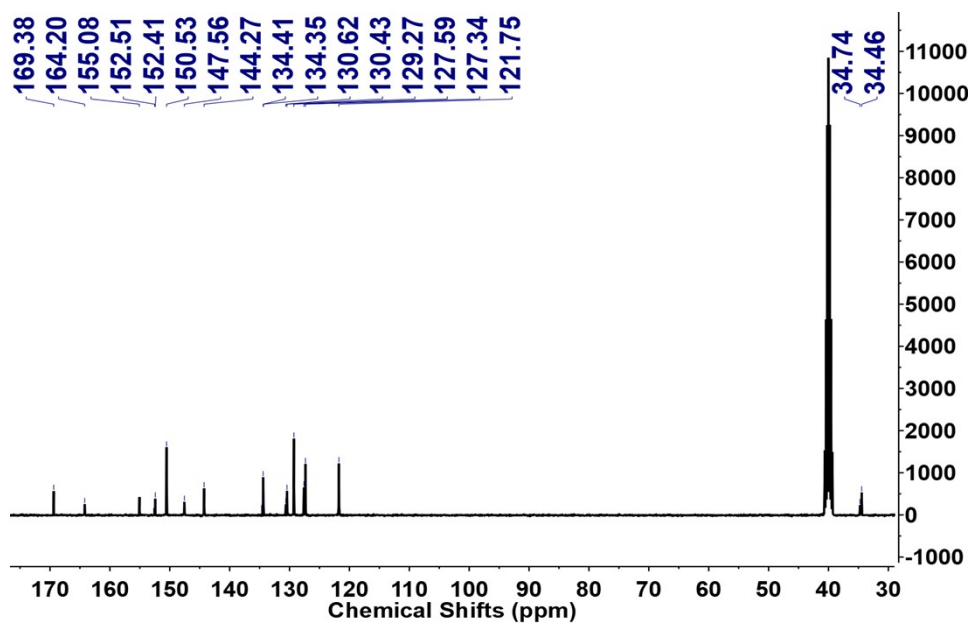

Figure S32. <sup>13</sup>C-NMR of compound A10.

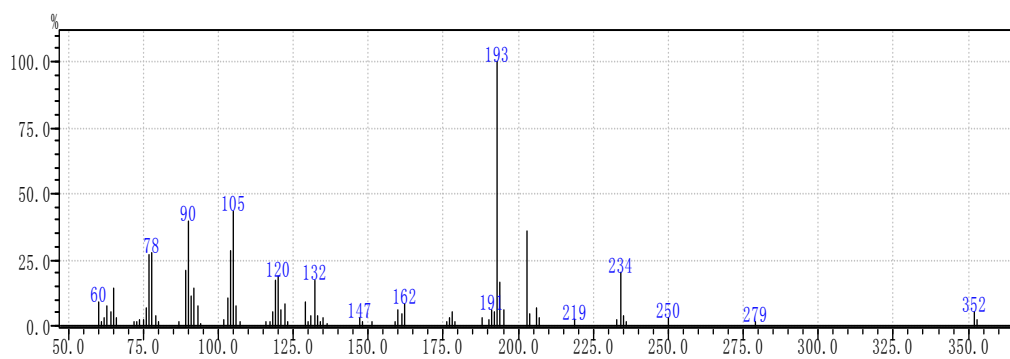

Figure S33. GC-MS of compound A10.

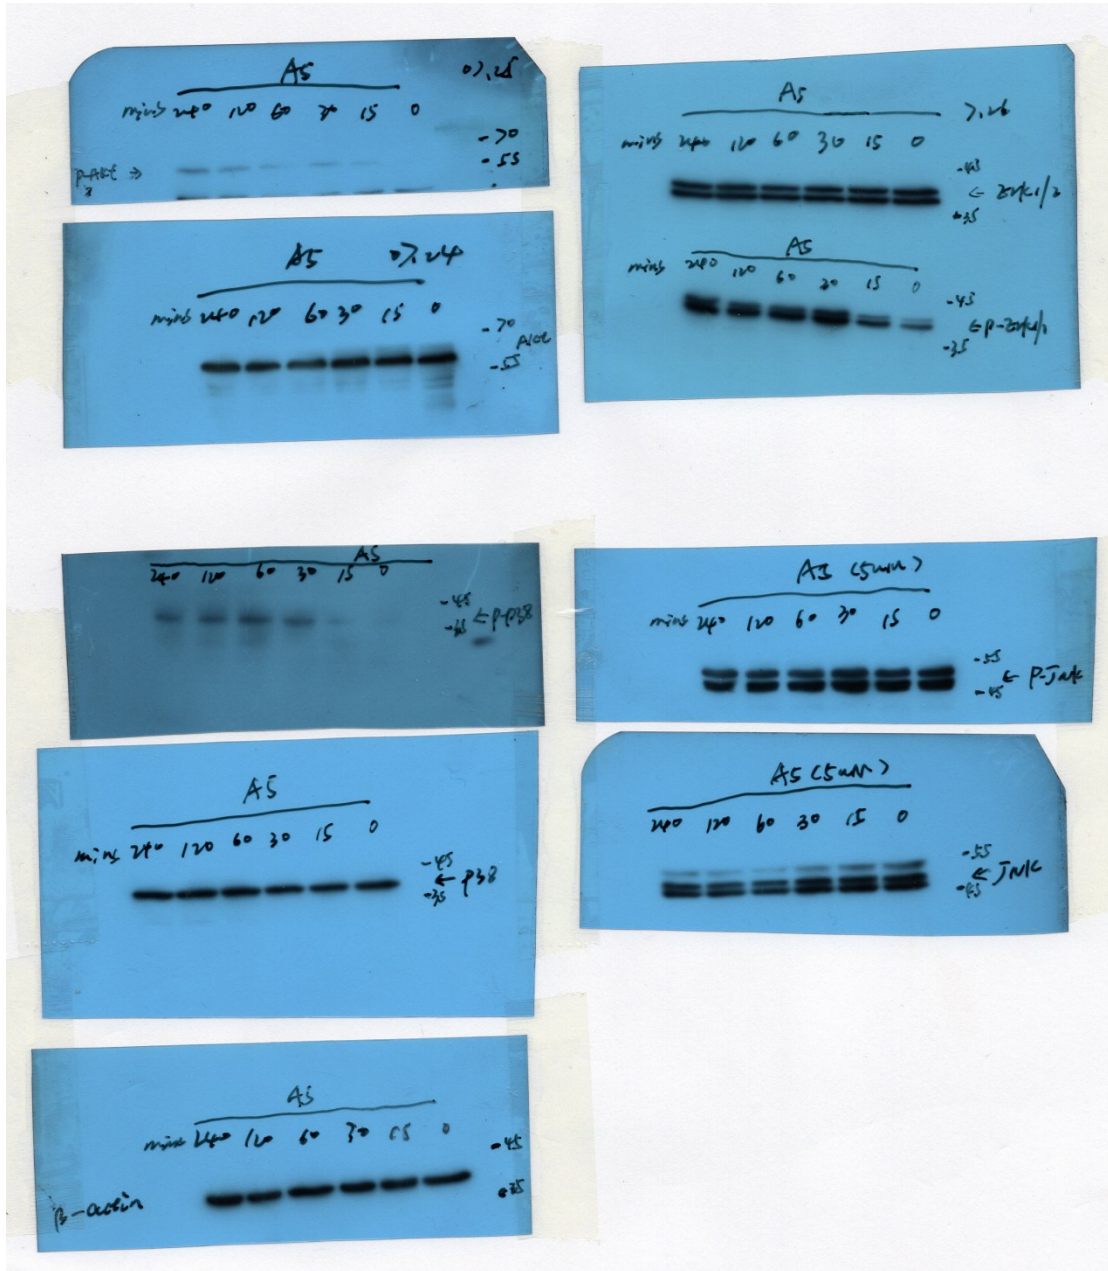

**Figure S34.** Western blot analysis of the cell signaling pathways in Neuro-2a cells induced by compound A5.
